# Supplementary material
Source: Elsevier journal article supplement (http://halshs.archives-ouvertes.fr/halshs-00752051v1/file/mmc1.pdf)
Supplement: mmc1 [file mmc1.pdf]

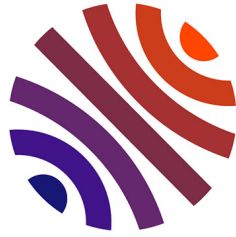

**HAL**  
open science

# BILAN CRITIQUE DE CINQUANTE ANS D'ETUDES SUR LE DEVENIR ADULTE DES ENFANTS PLACES

Isabelle Frechon, Annick-Camille Dumaret

► **To cite this version:**

Isabelle Frechon, Annick-Camille Dumaret. BILAN CRITIQUE DE CINQUANTE ANS D'ETUDES SUR LE DEVENIR ADULTE DES ENFANTS PLACES. *Neuropsychiatrie de l'Enfance et de l'Adolescence*, 2008, 56 (3), pp.117-172. 10.1016/j.neurenf.2008.01.015 . halshs-00752051

**HAL Id: halshs-00752051**

**<https://shs.hal.science/halshs-00752051>**

Submitted on 14 Nov 2012

**HAL** is a multi-disciplinary open access archive for the deposit and dissemination of scientific research documents, whether they are published or not. The documents may come from teaching and research institutions in France or abroad, or from public or private research centers.

L'archive ouverte pluridisciplinaire **HAL**, est destinée au dépôt et à la diffusion de documents scientifiques de niveau recherche, publiés ou non, émanant des établissements d'enseignement et de recherche français ou étrangers, des laboratoires publics ou privés.

| Auteur, date, pays [références biblio.]                             | Population, caractéristiques de l'échantillon étudié                                                                                                                                                                                       | Recul depuis la sortie, âge enquête         | Méthodologie, groupes de comparaison                                                                                                                                                                                                                                      |
|---------------------------------------------------------------------|--------------------------------------------------------------------------------------------------------------------------------------------------------------------------------------------------------------------------------------------|---------------------------------------------|---------------------------------------------------------------------------------------------------------------------------------------------------------------------------------------------------------------------------------------------------------------------------|
| T1- SALO R., 1956, Finlande [37]                                    | 742 enfants ayant été placés ≥ 6 mois en FA et en foyer                                                                                                                                                                                    | m=27 ans                                    | Informations fournies par divers organismes + entretien individuel si possible. / Gr.Comp.: 437 frères et sœurs non placés                                                                                                                                                |
| T2- VAN DER WAALS P., 1960, Hollande [42]                           | Parmi 200 enfants admis entre 2-14 ans en FA sans aucun lien avec les parents, la moitié placés avant 6 ans. Etude de 160 sujets dont 18% n'ont eu qu'une seule FA jusqu'à la fin de prise en charge.                                      | > 30 ans                                    | Entretiens, peu de données en institution / Gr.Comp.: Non                                                                                                                                                                                                                 |
| T3- MEIER E.G., 1962, USA [54]                                      | FA: 66 des 82 H et F placés ≥ 5 ans sans retour en famille                                                                                                                                                                                 | 28-32 ans                                   | Transversale / Gr.Comp.: Non                                                                                                                                                                                                                                              |
| T4- BOHMAN M., SIGVARDSSON S., 1980, Suède [15]                     | Parmi 624 dossiers d'enfants nés 1956-1957 confiés pour adoption. Etude de 329 H dont 118 placés, 118 retours famille et 93 adoptions.                                                                                                     | 18-23 ans                                   | Longitudinale : suivis par panel à 11, 15, 18 et 23 ans. Dossiers administratifs, registre de l'armée (n=263) et registres de criminalité. / Gr.Comp.: H nés le même jour dans la même ville                                                                              |
| T5- RAITHEL M., WOLLENSACK H., 1980, Allemagne, RFA [38]            | Villages d'enfants: parmi les 287 admis 1958-1961, 180 sujets nés 1946-1954, arrivée > 3 ans. 151 en vie et sortis indépendants. Etude de 114 sujets (67H, 47F) avec un séjour moyen de 7,7 ans                                            | Recul: > 5 ans ;<br>22-30 ans<br>(m=26 ans) | Catamnastique : 180 dossiers, 114 entretiens, test de l'image de soi, casiers judiciaires / Gr.Comp.: Enquêtes nationales                                                                                                                                                 |
| T6- MURPHY H.M.B., 1964, Canada [20]                                | Placement familial: 316 placés entre 1930-1950 ≥ 5 ans, puis étude de 30 sujets                                                                                                                                                            |                                             | Informations par les travailleurs sociaux les ayant connus, confrontation avec celles obtenues auprès des sujets retrouvés: 30 entretiens cliniques (test de Rorschach) / Gr.Comp.: comparaison interne, 114 de milieu d'origine défavorisé et 85 de milieu sans problème |
| T7- KRAUS J., 1981, Australie [16]                                  | FA et foyers: 491 nés en 1951-52 (246H, 245F), placés après l'âge de 2 mois, tous sortis à 18 ans                                                                                                                                          | 28-29 ans                                   | Fichiers officiels de délinquance / Gr.Comp.: Non                                                                                                                                                                                                                         |
| T8- SAWRAS J., 1981, France, Nord [18]                              | Foyer semi liberté: parmi 326 jeunes placés entre 1974 et 1979. Etude sur 108 garçons ≥ 24 ans à l'enquête. 50 retrouvés dont 30 sortis entre 16-18 ans et 20 entre 18-20 ans. Séjour moyen= 33 mois.                                      | 24-29 ans<br>(m=25,5 ans)                   | Transversal : 50 Q standardisés, 46 extraits des casiers judiciaires (bull.1), 40 entretiens directifs / Gr.Comp.: Non                                                                                                                                                    |
| T9- DUMARET A., 1982, France [14]                                   | Villages d'enfants: parmi 400 admissions 1957-1980, 376 sujets (179H, 197F) sortis entre 18-21 ans, soit 98 fratries.                                                                                                                      | 18-35 ans                                   | Catamnastique : 212 Q directs et 148 Q aux FA, éducateurs et fratries / Gr.Comp.: Enquêtes nationales                                                                                                                                                                     |
| T10- ZIMMERMAN Rosalie B., 1982, USA [40]                           | 61 sujets en FA                                                                                                                                                                                                                            | 19-29 ans                                   | Rétrospective; entretien / Gr.Comp.: Non                                                                                                                                                                                                                                  |
| T11- FESTINGER T., 1983, USA [26]                                   | Parmi 421 nés 1954-1957, placés ≥ 5 ans, 3/4 en FA, 394 sujets (exclus: déficients mentaux, sourds et psychotiques). Etude de 277 sortis entre 18-21 ans en 1975 (161H, 116 F)                                                             | Recul > 4 ans ;<br>24-26 ans                | Catamnastique : 241/277 entretiens dont 55 par téléphone et Q détaillés pour les autres / Gr.Comp.: Enquêtes nationales                                                                                                                                                   |
| T12- QUINTON D., RUTTER M., 1984, Grande-Bretagne [2]               | 48 familles avec 1 enfant de 5-8 ans au foyer et 1 enfant placé pour la deuxième fois (sans handicap mental ou physique). 36 ont 2 enfants placés                                                                                          |                                             | Rétrospective : entretiens, tests psychologiques / Gr.Comp.: 47 familles du même quartier avec enfant du même âge non placé                                                                                                                                               |
| T13- QUINTON D., RUTTER M., 1984, Grande-Bretagne [9-10]            | Parmi 94 filles en foyer (placées en 1964 ≥ 4 ans, 2/3 admis avant 5 ans et sorties à l'adolescence) dont 5 décédées. Etude de 81 femmes                                                                                                   | 21-27 ans                                   | Prospective intergénérationnelle, Entretiens dans les 2 groupes / Gr.Comp.: 51 F suivies dans l'enfance, même quartier, jamais placées                                                                                                                                    |
| T14- CHARTIER J.-P., RIVA H., 1985, France [24]                     | Foyer: séjours ≥ 2 ans et sortis ≥ âge de 10 ans, 2/3 de l'ensemble des anciens ont gardé des relations et 1/3 n'ont pas gardé de relation. Etude de 30 sujets                                                                             |                                             | Echantillon au hasard (mais même proportion de sujets ayant ou non des liens avec l'institution), entretiens non directifs / Gr.Comp.: non                                                                                                                                |
| T15- CORBILLON M., ASSAILLY J.-P., DUyme M., 1990, France [7]       | FA et foyers: 2 départements (D1, D2): 286 nés 1954 (D1) et 277 nés 1947 et 1954 (D2), soit 563 sujets, sortis tous âges                                                                                                                   | 32-39 ans                                   | Catamnastique sur suivi de 2 générations / Gr.Comp.: Enquêtes nationales                                                                                                                                                                                                  |
| T15bis- CORBILLON M., ASSAILLY J.-P., DUyme M., 1990, France [7]    | Parmi 286 du département D1 (48% en FA et 52% en foyer), étude de 131. 72% placés par décision judiciaire, 36,5% placés après 11 ans. Les 3/4 sortis ≥ 18 ans.                                                                             | 34-35 ans                                   | (suite) enquête sur les reproducteurs: 104 Q postal (ou entretien téléphonique) + 27 dossiers / Gr.Comp.: Enquêtes nationales                                                                                                                                             |
| T16- CORBILLON M., AUSCHER T., 1990, France [8]                     | 1 département, ASE: pupilles et placements judiciaires nés en 1954, majorité en FA: 150 sujets (51,5% H, 48,5% F), âge médian d'admission: 5 ans. Etude de 121 dont 85,5% ≥ 18 ans                                                         | 34-35 ans                                   | Catamnastique; dossiers institutionnels, Q postal ou entretien téléphonique, complétés auprès d'organismes sociaux. Etude sur dossiers uniquement pour les reproducteurs / Gr.Comp.: Enquêtes nationales                                                                  |
| T17- RUTTER M., QUINTON D., HILL J., 1990, Grande-Bretagne [28]     | Parmi 123 garçons en foyer sortis à l'adolescence (voir étude n°13), étude de 91 sujets                                                                                                                                                    |                                             | Interview avec Q: les sujets et leurs conjoints: pour les 2 groupes. Casiers judiciaires / Gr.Comp.: 58 garçons du même âge, ayant toujours vécu en famille dans le même quartier                                                                                         |
| T18- POUSSIN G (dir.) 1991 [21]                                     | Parmi 89 ex-placés nés entre 1928-1969 et sortis entre 18-21 ans ayant bien réussi. Etude de 12 sujets (9H, 3F)                                                                                                                            | tous âges                                   | Choix par les travailleurs sociaux en activité et retraités (critères: réussite scolaire, adaptation sociale, reproduction, capacités relationnelles). Dossiers institutionnels, entretiens / Gr.Comp.: non                                                               |
| T19- BAUER D., DUBECHOT P., LEGROS M., 1993, France [13]            | Parmi 1189 dossiers (5 départements), les placés ≥ 1 an à l'adolescence, fichier A: 384 ASE et 116 PJJ (273H et 227F), complété par fichier B (71). Sortis majeurs. Les deux tiers en FA pendant 12 ans, les 3/4 ont eu plusieurs mesures. | Recul: > 4 ans ;<br>21-24 ans               | Transversale : 367 Q par entretien + 30 entretiens semi-directifs / Gr.Comp.: Enquêtes nationales                                                                                                                                                                         |
| T20- CHEUNG S.I., HEATH A., 1994, Grande-Bretagne [29]              | Parmi la cohorte NCDS (sujets nés 3-9 mars 1958), 354 ex-placés à 23 ans et 251 à 33 ans                                                                                                                                                   | 23 ans et 33 ans                            | Les 2 dernières des 5 vagues d'enquêtes d'une cohorte / Gr.Comp.: les non placés de la cohorte nationale (environ 11 à 12000 sujets)                                                                                                                                      |
| T20bis- CHEUNG S.I., BUCHANAN A., 1997, GB [30]                     | Parmi la cohorte NCDS (sujets nés 3-9 mars 1958), 66 ex-placés à 23 ans et 38 à 33 ans                                                                                                                                                     | idem n° 20                                  | Idem n°20 complété par des entretiens et Q: Malaise Inventory / Gr.Comp.: les non placés de la cohorte nationale                                                                                                                                                          |
| T21- DUMARET A.C., COPPEL M., COURAUD S. (1995, 1997), France [4-6] | Parmi 2843 admissions en 1967-78, 58 sujets placés ≥ 5 ans, sortis entre 1972-84 et > 23 ans à l'enquête. Ajoutés: 5 aînés des familles. Etude: 63 sujets (33H, 30F) dont 35% sortis à 17 ans et plus. Séjour moyen: 8 ans.                | Recul ≥ 5 ans ;<br>23-39 ans<br>(m=27,5)    | Catamnastique, suivi sur 2 générations. Entretien semi-directif (45) + informations auprès des fratries, entretiens FA et équipes sociales (14) / Gr.Comp.: sujets ex-placés en villages d'enfants (enquête n°9)                                                          |
| T22- BAUER F., MERCKLE P., 1995, France [25]                        | 1 département, ASE. Parmi plusieurs milliers de pupilles et anciens placés: 31 sujets dont 26 placés avant l'âge de 5 ans, sortis entre 18-21 ans.                                                                                         | 18-60 ans                                   | Transversale non représentative: appel à témoignage par la presse et la radio; Entretiens / Gr.Comp.: Non                                                                                                                                                                 |
| T23- ANAUT M., 1997, France [3]                                     | 1 département, ASE, population choisie sur une année d'admission: étude de 34 familles (56 enfants).                                                                                                                                       |                                             | Rétrospective : Q pour chaque nouvel enfant placé, pas d'informations pour 56% des mères / Gr.Comp.: Non                                                                                                                                                                  |
| T24- GARDNER H. 1998, Australie [22]                                | FA et unités familiales: population non précisée. Pas de handicap. Etude 39 adultes anciens placés (11H, 28F) admis en moyenne à 4,6 ans pour une durée moyenne de 12 ans.                                                                 | 19-65 ans<br>(m= 33,4 ans)                  | Entretiens semi-directifs + test des relations familiales / Gr.Comp.: 39 de familles sans enfants placés, appariées selon âge et sexe                                                                                                                                     |

| Auteur, date, pays [références biblio.]        | Population, caractéristiques de l'échantillon étudié                                                                                                     | Recul depuis la sortie, âge enquête                                    | Méthodologie, groupes de comparaison                                                                                                                                               |
|------------------------------------------------|----------------------------------------------------------------------------------------------------------------------------------------------------------|------------------------------------------------------------------------|------------------------------------------------------------------------------------------------------------------------------------------------------------------------------------|
| T25- MOUTASSEM-MIMOUNI B. 1999, Algérie [19]   | Parmi 478 abandons à la naissance, nés 1963-1978, 305 en FA avant 5-6 ans, 173 en foyers (45 handicapés). Etude de 287 sujets (114 en FA, 173 en foyers) | m=28 ans                                                               | Catamnastique : enquête auprès des équipes sociales; quelques entretiens / Gr.Comp.: Enquêtes nationales                                                                           |
| T26- MOUHOT F., 2001, France [23]              | Tous types de placement ASE, tous âges de placement. Etude de 49 sujets                                                                                  | 19-34 ans (dont 23>21 ans)                                             | Clinique : 36 entretiens + 13 recueils indirects auprès des familles bio et FA / Gr.Comp.: Non                                                                                     |
| T27- GHEORGHUI M. et col. 2002, France [34-35] | 1 département: des milliers sujets nés entre 1960-1981 à l'ASE, sortis entre 16-18 ans. Etude sur 72 sujets (24H, 48F)                                   | 19-40 ans                                                              | Transversale : 72 entretiens semi-directifs / Gr.Comp.: Non                                                                                                                        |
| T28- FRECHON I., 2003, France [11-12]          | Foyer (femmes), admission 15-21 ans. Parmi les 170 placées 1982-1996: 136 ayant un placement ≥ 6 mois, sorties en moyenne à 18 ans. Etude de 68 sujets   | Recul moyen : 6,5 ans; 19-32 ans (m=25,4 ans)                          | Transversale et analyse biographique : 136 dossiers, 68 questionnaires, 30 entretiens semi-directifs / Gr.Comp.: Enquêtes nationales                                               |
| T29- FERNANDEZ J., et col., 2003, Espagne [46] | Parmi 370 enfants placés en foyer entre 1975-92, 272 pris en charge ≥ 1 an; sortis ≥ 1 an; Etude sur 153 sujets (64H, 89F)                               | 16-29 ans<br>12% : 16-18 ans<br>41% : 22-29 ans<br>70% : recul ≥ 3 ans | Transversale, Etude des 272 dossiers; 153 entretiens semi directifs / Gr. Comp.: Non                                                                                               |
| T30- ANDERSSON G., 2005, Suède [27]            | Parmi les enfants d'un foyer placés au début des années 1980 et âgés de 0-4ans, 26 dont 20 placés plusieurs années (16H et 10F)                          | 20-25 ans                                                              | Longitudinale, 3 vagues d'enquête (3-9 mois, 5-10 ans, 15-20 ans). A 20-25 ans, entretiens avec les anciens placés uniquement et test de bien-être (Q standardisé) / Gr.Comp.: Non |
| T31- HUBERT T. et col., 2006, France [33]      | Hébergement individualisé: parmi 86 jeunes (32H, 54F) pris en charge ≥ 6 mois, sortis entre 18-21 ans, 37 sujets (12H, 25F)                              | 24-33 ans                                                              | Transversale et analyse biographique: 86 dossiers, 37 questionnaires (dont 21 avec la fiche age-événement) / Gr.Comp.: Enquêtes nationales + étude n°28                            |

Légende : FA : Famille d'accueil; m=: âge moyen à l'enquête; Gr. Comp. : Groupe de comparaison; H. & F. : Hommes & femmes; Q.: Questionnaire
